# Supplementary material for: Polymeric Compounds of Lingonberry Waste: Characterization of Antioxidant and Hypolipidemic Polysaccharides and Polyphenol-Polysaccharide Conjugates from Vaccinium vitis-idaea Press Cake
Source: MDPI journal article supplement (doi:10.3390/foods11182801), 2022-09-11
Supplement: s1 [file s1]

# Polymeric Compounds of Lingonberry Waste: Characterization of Antioxidant and Hypolipidemic Polysaccharides and Polyphenol-Polysaccharide Conjugates from *Vaccinium vitis-idaea* Press Cake

Daniil N. Olennikov <sup>1,\*</sup>, Vladimir V. Chemposov <sup>2</sup> and Nadezhda K. Chirikova <sup>2</sup>

<sup>1</sup> Laboratory of Medical and Biological Research, Institute of General and Experimental Biology, Siberian Division, Russian Academy of Science, 670047 Ulan-Ude, Russia

<sup>2</sup> Department of Biology, Institute of Natural Sciences, North-Eastern Federal University, 677027 Yakutsk, Russia

\* Correspondence: olennikovdn@mail.ru; Tel.: +8-902-160-06-27

## Supplementary Content

**Table S1.** Antioxidant activity of degradation polymers DEAE-1% NaOH-f1-d and DEAE-1% NaOH-f2-d.

**Table S2.** *In vitro* hypolipidemic activity of degradation polymers DEAE-1% NaOH-f1-d and DEAE-1% NaOH-f2-d.

**Figure S1.** HPLC-UV chromatograms of PMP-labeled samples of blank, standard monosaccharide mixture, and 2 M TFA hydrolysates of VVPS polysaccharide, fraction VVPS: DEAE-H<sub>2</sub>O, and fraction VVPS: DEAE-1% NaOH

**Figure S2.** Possible ways of MS/MS cleavage of degradation products 3–7 released after alkaline destruction of DEAE-1% NaOH-f1 and DEAE-1% NaOH-f2 polymers.

**Table S1.** Antioxidant activity of degradation polymers DEAE-1% NaOH-f1-d and DEAE-1% NaOH-f2-d.

| Polysaccharide    | DPPH <sup>•a</sup> | ABTS <sup>•+a</sup> | O <sub>2</sub> <sup>•-a</sup> | OH <sup>•a</sup> | Cl <sup>•b</sup> | NO <sup>a</sup> | H <sub>2</sub> O <sub>2</sub> <sup>c</sup> | FeCA <sup>d</sup> |
|-------------------|--------------------|---------------------|-------------------------------|------------------|------------------|-----------------|--------------------------------------------|-------------------|
| DEAE-1% NaOH-f1-d | > 100              | > 100               | > 250                         | > 100            | < 5              | > 500           | > 5                                        | < 0.01            |
| DEAE-1% NaOH-f2-d | > 100              | > 100               | > 250                         | > 100            | < 5              | > 500           | > 5                                        | < 0.01            |

<sup>a</sup> IC<sub>50</sub>, µg/mL; <sup>b</sup> Trolox-equivalents, mg/g; <sup>c</sup> IC<sub>50</sub>, mg/mL; <sup>d</sup> mM Fe<sup>2+</sup>/g.

**Table S2.** *In vitro* hypolipidemic activity of degradation polymers DEAE-1% NaOH-f1-d and DEAE-1% NaOH-f2-d.

| Polysaccharide fraction | Bile acids binding,<br>µmole/100 g | Fat binding,<br>g/100 g | Cholesterol<br>binding, mg/g | Pancreatic lipase inhibition,<br>IC <sub>50</sub> , mg/mL |
|-------------------------|------------------------------------|-------------------------|------------------------------|-----------------------------------------------------------|
| DEAE-1% NaOH-f1-d       | 0.01 ± 0.00                        | Inactive (< 1)          | 2.28 ± 0.11                  | Inactive (> 30)                                           |
| DEAE-1% NaOH-f2-d       | 0.01 ± 0.00                        | Inactive (< 1)          | 2.09 ± 0.08                  | Inactive (> 30)                                           |

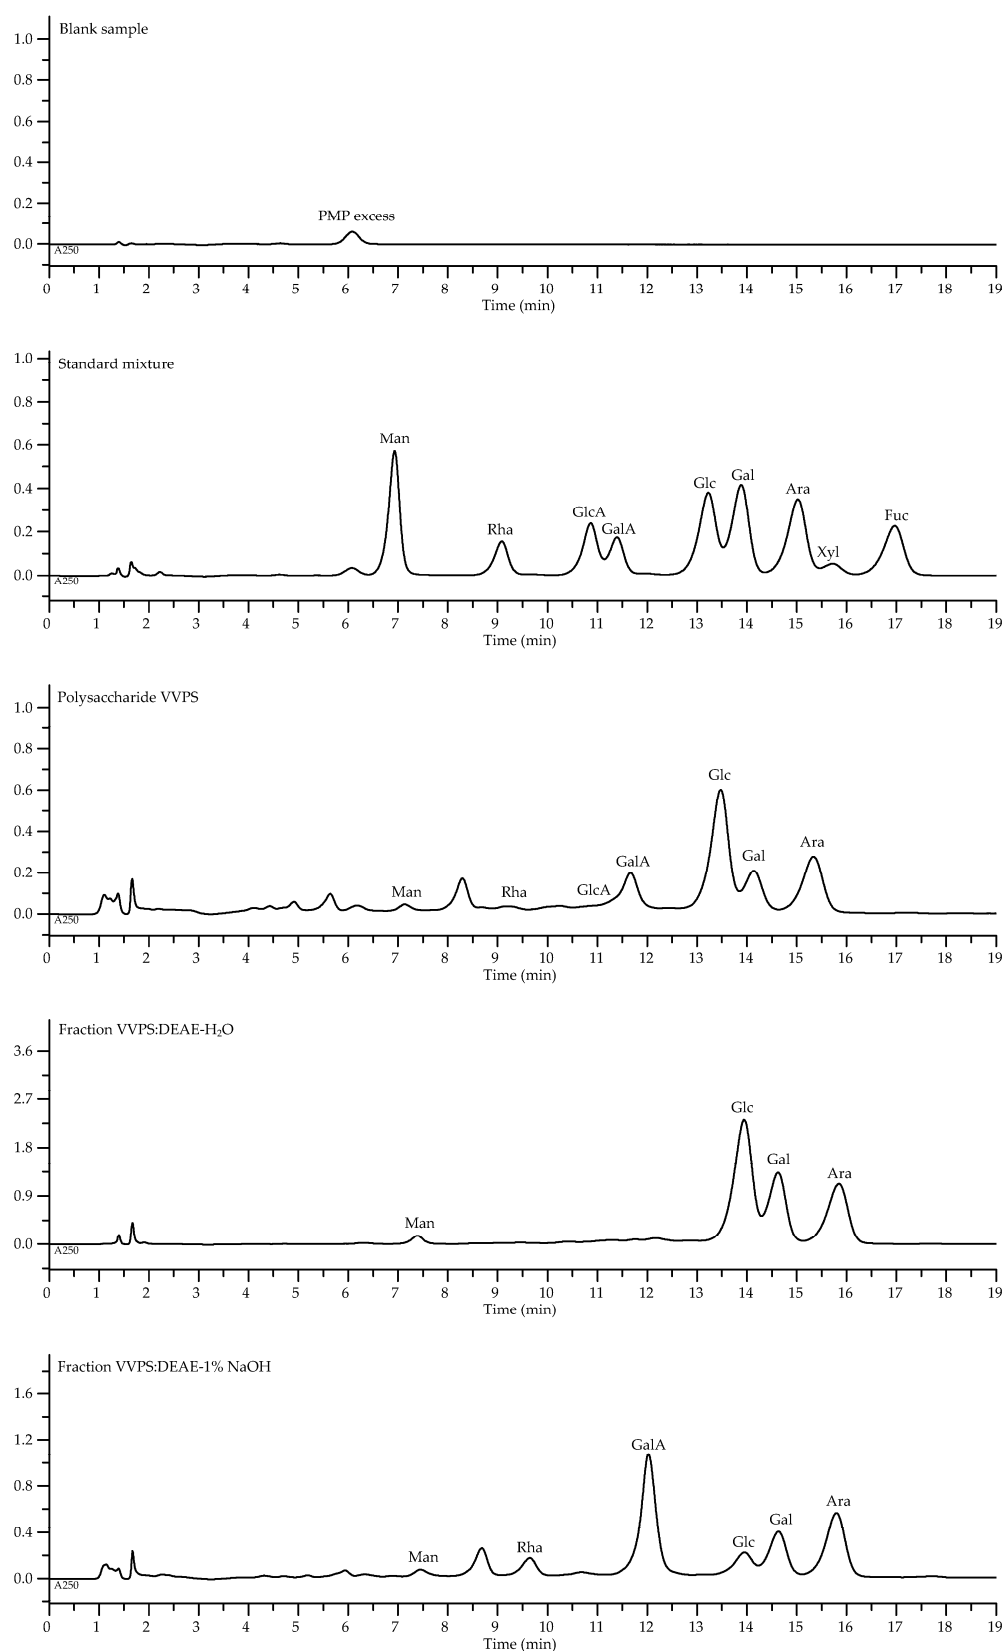

**Figure S1.** HPLC-UV chromatograms of PMP-labeled samples of blank (a), standard monosaccharide mixture (b), and 2 M TFA hydrolysates of VVPS polysaccharide (c), fraction VVPS: DEAE-H<sub>2</sub>O (d), and fraction VVPS: DEAE-1% NaOH (e). Relative retention times ( $t_R$ ) of monosaccharides: Man = 1.00; Rha = 1.35; GlcA = 1.59; GalA = 1.68; Glc = 1.94; Gal = 2.04; Ara = 2.21; Xyl = 2.31; Fuc = 2.50.

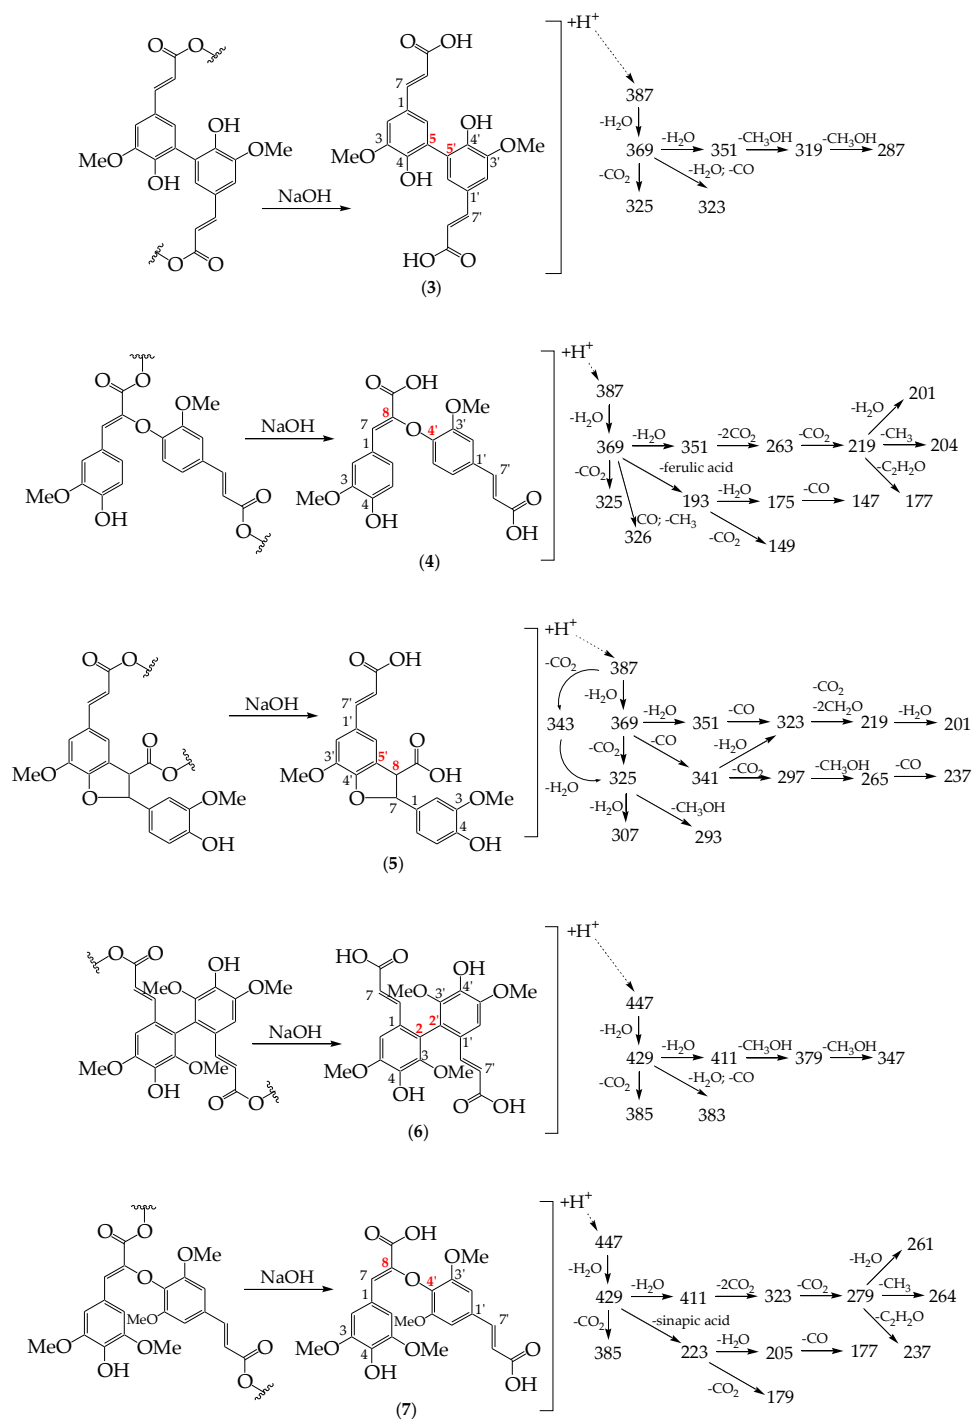

**Figure S2.** Possible ways of MS/MS cleavage of degradation products 3–7 released after alkaline destruction of DEAE-1% NaOH-f1 and DEAE-1% NaOH-f2 polymers.
